# Supplementary material for: Cr and Co-modified Cu/Al2O3 as an efficient catalyst for the continuous synthesis of bis(2-dimethylaminoethyl)ether
Source: Royal Society of Chemistry journal article supplement (doi:10.1039/d1cy02155a), 2022-01-01
Supplement: d1cy02155a1.pdf [file d1cy02155a1.pdf]

# Selective continuous synthesis of bis(2-dimethylaminoethyl)ether over Cr and Co modified Cu/Al<sub>2</sub>O<sub>3</sub> catalyst

*Yuyao Zeng,<sup>a,b</sup> Bowei Wang<sup>\*a,b,c</sup>, Wensheng Xu<sup>a</sup>, Xilong Yan,<sup>a,b,c</sup> Yang Li,<sup>a,b,c</sup> Guoyi Bai<sup>d</sup>  
and Ligong Chen<sup>\*a,b,c</sup>*

<sup>a</sup> School of Chemical Engineering and Technology, Tianjin University, Tianjin 300350,  
People's Republic of China.

<sup>b</sup> Collaborative Innovation Center of Chemical Science and Engineering (Tianjin),  
Tianjin 300072, People's Republic of China.

<sup>c</sup> Tianjin Engineering Research Center of Functional Fine Chemicals, Tianjin, People's  
Republic of China.

<sup>d</sup> Key Laboratory of Chemical Biology of Hebei Province, College of Chemistry and  
Environmental Science, Hebei University, Baoding 071002, People's Republic of China.

\* Corresponding authors: [bwwang@tju.edu.cn](mailto:bwwang@tju.edu.cn) (Bowei Wang); [lgchen@tju.edu.cn](mailto:lgchen@tju.edu.cn)  
(Ligong Chen).

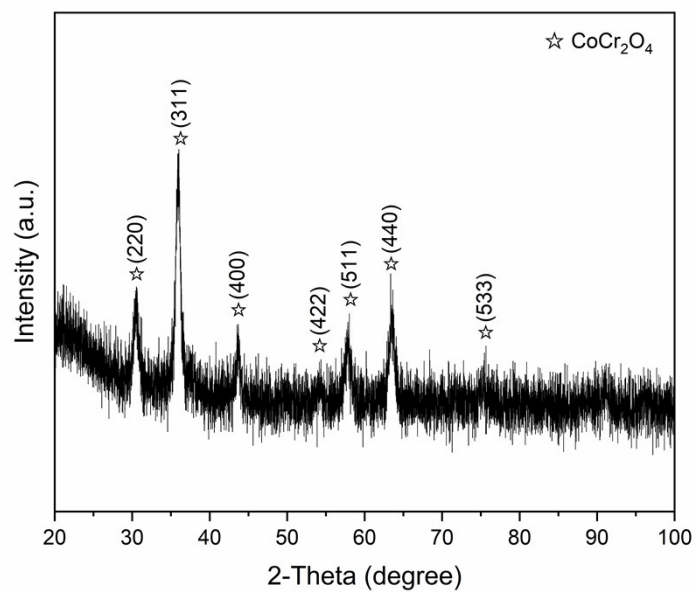

Figure S1 XRD pattern of prepared  $\text{CoCr}_2\text{O}_4$ .

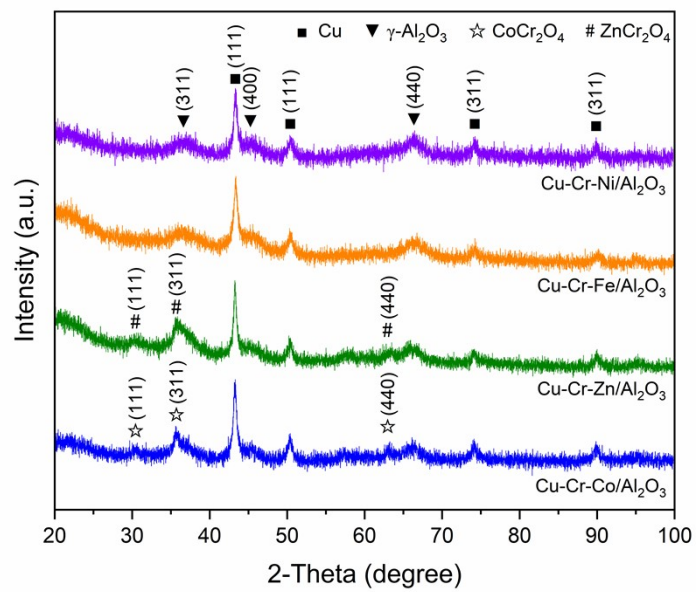

Figure S2 XRD patterns of reduced co-doped Cu-based catalysts.

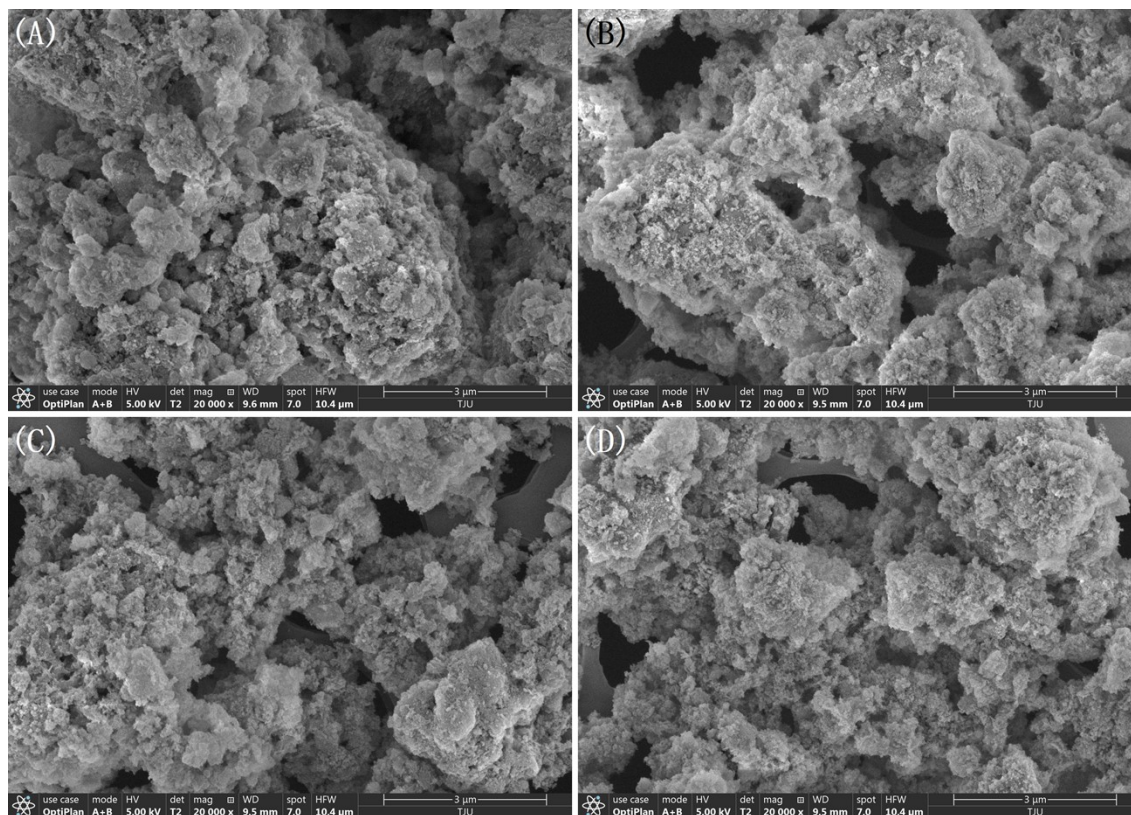

Figure S3 SEM images of reduced (A)  $\text{Cu}/\text{Al}_2\text{O}_3$ , (B)  $\text{Cu-Cr-Co}/\text{Al}_2\text{O}_3$  (C)  $\text{Cu-Cr-Co}/\text{Al}_2\text{O}_3$  and (D) used  $\text{Cu-Cr-Co}/\text{Al}_2\text{O}_3$ .

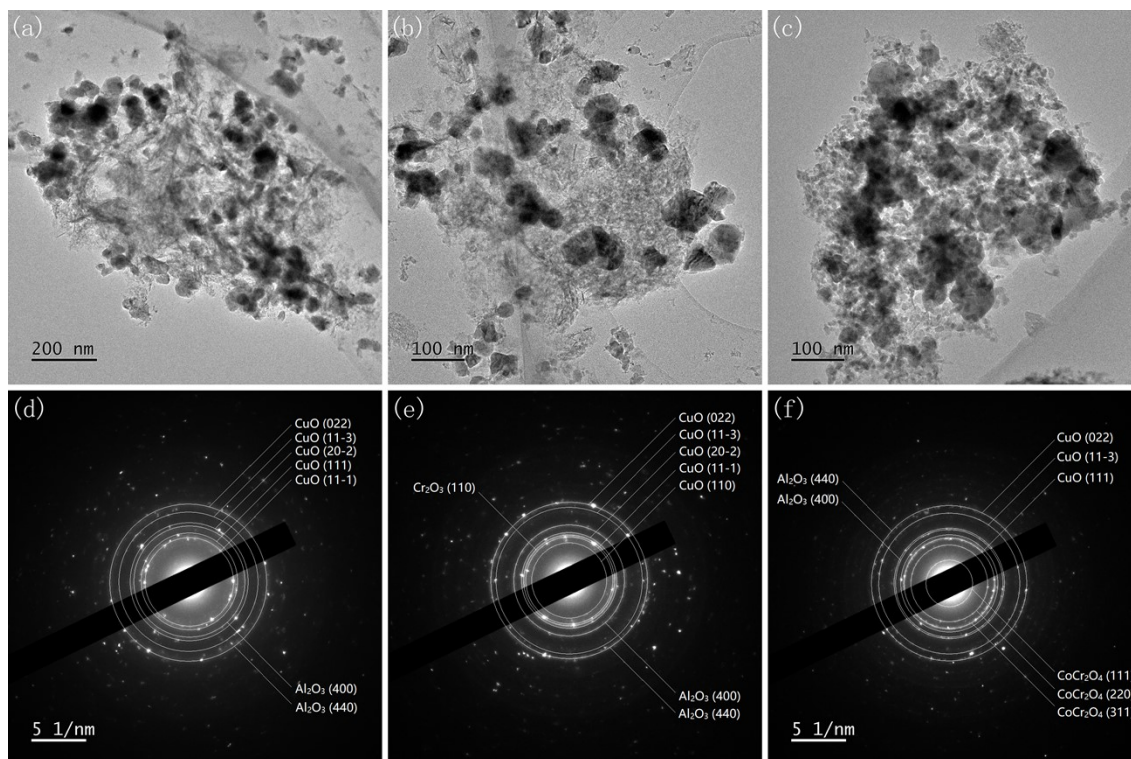

Figure S4 TEM images of unreduced (a) Cu/Al<sub>2</sub>O<sub>3</sub>, (b) Cu-Cr/Al<sub>2</sub>O<sub>3</sub>, and (c) Cu-Cr-Co/Al<sub>2</sub>O<sub>3</sub>; selected area electron diffraction (SAED) patterns of unreduced (d) Cu/Al<sub>2</sub>O<sub>3</sub>, (e) Cu-Cr/Al<sub>2</sub>O<sub>3</sub>, and (f) Cu-Cr-Co/Al<sub>2</sub>O<sub>3</sub>.

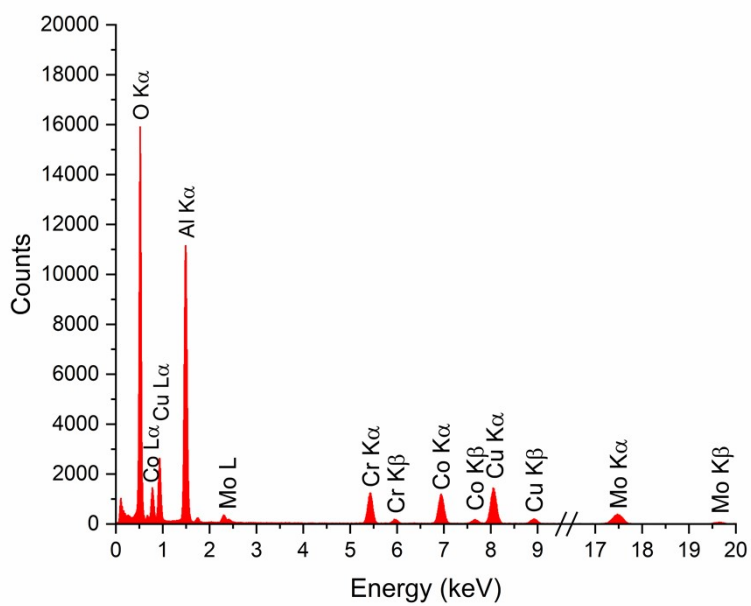

Figure S5 EDS spectrum of reduced Cu-Cr-Co/Al<sub>2</sub>O<sub>3</sub>.

Table S1. Cu dispersion and acidic sites concentration of Cu-based catalysts.

| Catalyst                                | Cu Content <sup>a</sup><br>(%) | D <sub>Cu</sub> <sup>b</sup><br>(%) | S <sub>Cu</sub> <sup>b</sup><br>(m <sup>2</sup> /g) | Acidic sites concentration <sup>c</sup> (mmol/g) |          |          |       | TOF<br>(h <sup>-1</sup> ) |
|-----------------------------------------|--------------------------------|-------------------------------------|-----------------------------------------------------|--------------------------------------------------|----------|----------|-------|---------------------------|
|                                         |                                |                                     |                                                     | Weak                                             | M-strong | S-strong | Total |                           |
| Cu/Al <sub>2</sub> O <sub>3</sub>       | 19.75                          | 10.5                                | 13.5                                                | 0.31                                             | 0.74     | 0.19     | 1.24  | 1.9                       |
| Cu-Cr/Al <sub>2</sub> O <sub>3</sub>    | 18.86                          | 12.5                                | 15.3                                                | 0.34                                             | 0.68     | -        | 1.02  | 2.2                       |
| Cu-Cr-Co/Al <sub>2</sub> O <sub>3</sub> | 17.87                          | 17.8                                | 20.6                                                | 0.36                                             | 0.77     | -        | 1.13  | 3.3                       |
| Cu-Cr-Fe/Al <sub>2</sub> O <sub>3</sub> | 19.01                          | 14.1                                | 17.4                                                | 0.29                                             | 0.58     | -        | 0.87  | 2.5                       |
| Cu-Cr-Ni/Al <sub>2</sub> O <sub>3</sub> | 18.75                          | 14.9                                | 18.1                                                | 0.27                                             | 0.56     | -        | 0.83  | 2.4                       |
| Cu-Cr-Zn/Al <sub>2</sub> O <sub>3</sub> | 17.91                          | 17.1                                | 19.9                                                | 0.30                                             | 0.66     | -        | 0.96  | 2.9                       |

<sup>a</sup> Determined by ICP-OES.

<sup>b</sup> Determined by N<sub>2</sub>O chemisorption.

<sup>c</sup> Determined by NH<sub>3</sub>-TPD.

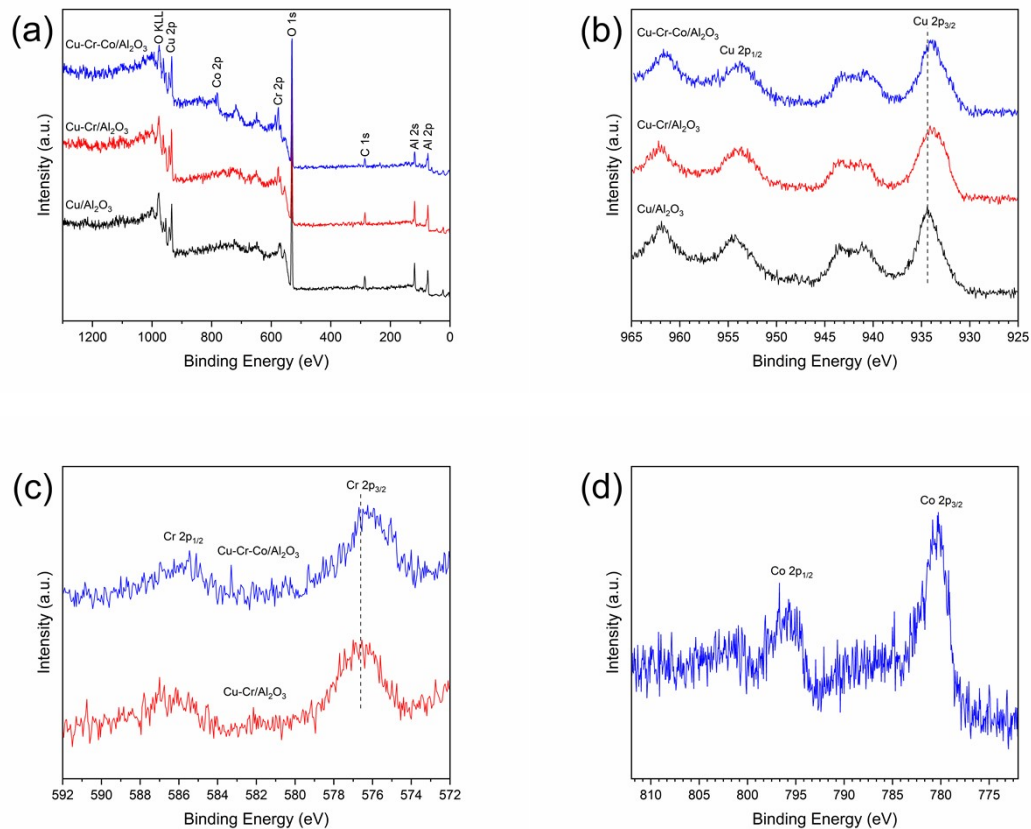

Figure S6 XPS spectra of calcined catalysts. (A) Cu 2p, (B) Cr 2p, (C) Co 2p and (D) survey spectra.

Table S2 XPS Peaks position of Cu-based catalysts.

| Catalysts                                        | B.E. (eV)            |                      |                      | $X_{\text{Cu}(0)/(\text{Cu(I)}+\text{Cu}(0))}$<br>(%) |
|--------------------------------------------------|----------------------|----------------------|----------------------|-------------------------------------------------------|
|                                                  | Cu 2p <sub>3/2</sub> | Cr 2p <sub>3/2</sub> | Co 2p <sub>3/2</sub> |                                                       |
| Calcined Cu/Al <sub>2</sub> O <sub>3</sub>       | 934.4                | -                    | -                    | -                                                     |
| Calcined Cu-Cr/Al <sub>2</sub> O <sub>3</sub>    | 934.0                | 576.6                | -                    | -                                                     |
| Calcined Cu-Cr-Co/Al <sub>2</sub> O <sub>3</sub> | 934.0                | 576.2                | 780.5                | -                                                     |
| Reduced Cu/Al <sub>2</sub> O <sub>3</sub>        | 932.1                | -                    | -                    | 63.6                                                  |
| Reduced Cu-Cr/Al <sub>2</sub> O <sub>3</sub>     | 931.8                | 576.7                | -                    | 89.0                                                  |
| Reduced Cu-Cr-Co/Al <sub>2</sub> O <sub>3</sub>  | 931.8                | 576.2                | 780.5                | 92.3                                                  |

Table S3 Structural properties and chemical compositions of catalysts.

| Catalysts                               | Metal loading <sup>a</sup> (%) |      |      | $S_{\text{BET}}^b$<br>(m <sup>2</sup> /g) | $V_p^b$<br>(cm <sup>3</sup> /g) | $d_p^b$<br>(nm) | Acid sites <sup>c</sup> (mmol/g) |                 |        | Cu particle sizes (nm) |                  |
|-----------------------------------------|--------------------------------|------|------|-------------------------------------------|---------------------------------|-----------------|----------------------------------|-----------------|--------|------------------------|------------------|
|                                         | Cu                             | Cr   | Co   |                                           |                                 |                 | LA <sup>d</sup>                  | BA <sup>e</sup> | Total  | XRD <sup>f</sup>       | TEM <sup>g</sup> |
| Cu/Al <sub>2</sub> O <sub>3</sub>       | 19.75                          | -    | -    | 150.0                                     | 0.32                            | 8.4             | 0.0873                           | 0.0138          | 0.1011 | 24.3                   | 27.7             |
| Cu-Cr/Al <sub>2</sub> O <sub>3</sub>    | 18.86                          | 6.11 | -    | 112.6                                     | 0.33                            | 10.7            | 0.0652                           | 0.0114          | 0.0766 | 18.4                   | 16.1             |
| Cu-Cr-Co/Al <sub>2</sub> O <sub>3</sub> | 17.87                          | 6.54 | 4.06 | 124.8                                     | 0.35                            | 11.1            | 0.0817                           | 0.0139          | 0.0956 | 17.9                   | 15.3             |

<sup>a</sup> Determined by ICP-OES.

<sup>b</sup> Determined by N<sub>2</sub> adsorption.

<sup>c</sup> determined by pyridine-FTIR.

<sup>d</sup> Lewis acidic sites.

<sup>e</sup> Brønsted acidic sites.

<sup>f</sup> determined by Scherrer equation.

<sup>g</sup> determined by TEM.

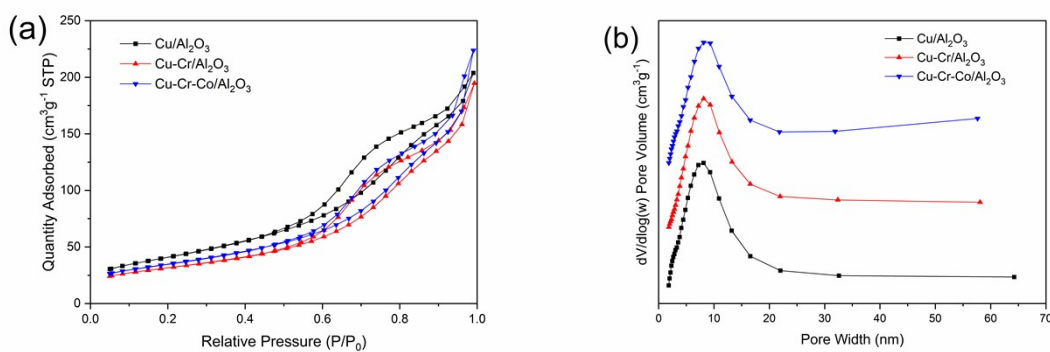Figure S7 (a) N<sub>2</sub> adsorption-desorption isotherms and (b) pore size distribution of catalysts.

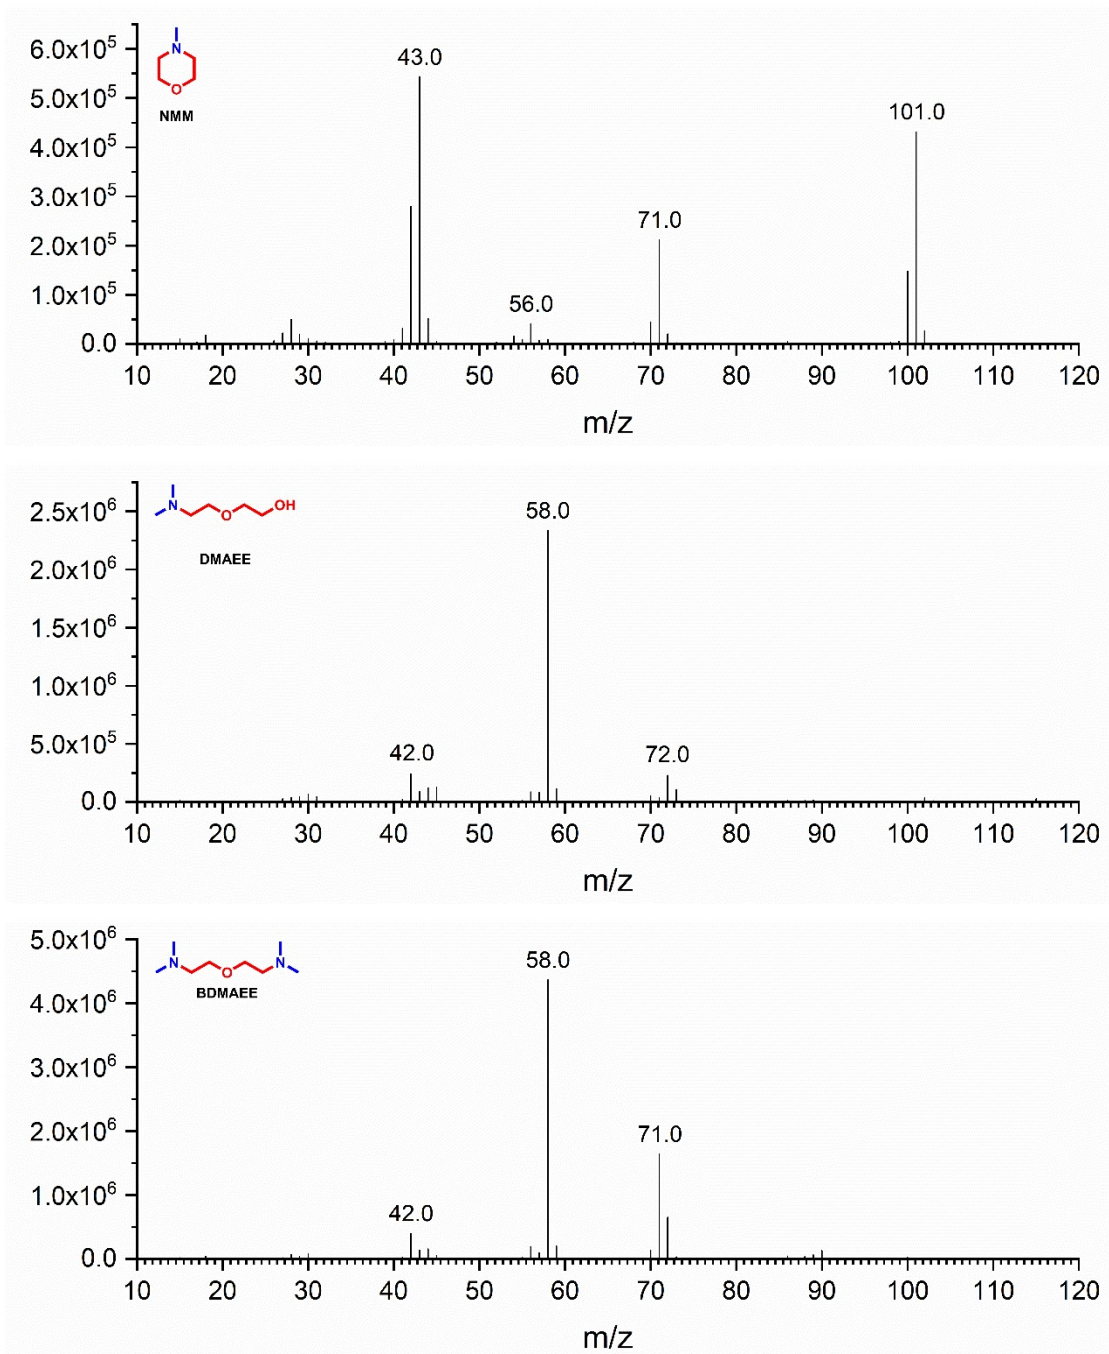

Figure S8 Mass spectra of the products in reaction mixture.

Table S4 Reaction of DEG with dimethylamine over different temperature.

| Temperature<br>(°C) | DEG<br>Conversion<br>(%) | Selectivity (%) |        |      |       | BDMAEE/NMM |
|---------------------|--------------------------|-----------------|--------|------|-------|------------|
|                     |                          | DMAEE           | BDMAEE | NMM  | Other |            |
| 150                 | 39.7                     | 84.0            | 4.6    | 6.4  | 5.0   | 0.7        |
| 170                 | 97.9                     | 27.9            | 21.7   | 42.0 | 8.4   | 0.5        |
| 190                 | 99.6                     | 9.1             | 55.2   | 26.7 | 9.0   | 2.1        |
| 210                 | 99.5                     | 4.5             | 37.8   | 29.2 | 28.5  | 1.3        |

Reaction conditions: Catalyst, Cu-Cr-Co/Al<sub>2</sub>O<sub>3</sub>; DMA/DEG (molar ratio) = 4:1; H<sub>2</sub> pressure, 3 MPa; LHSV, 0.3 h<sup>-1</sup>; Solvent, Methanol.

Table S5 Reaction of DEG with DMA over different H<sub>2</sub> pressure.

| H <sub>2</sub> pressure<br>(MPa) | DEG<br>Conversion<br>(%) | Selectivity (%) |        |      |       | BDMAEE/NMM |
|----------------------------------|--------------------------|-----------------|--------|------|-------|------------|
|                                  |                          | DMAEE           | BDMAEE | NMM  | Other |            |
| 2                                | 99.7                     | 13.1            | 28.9   | 47.4 | 10.6  | 0.6        |
| 3                                | 99.6                     | 9.1             | 55.2   | 26.7 | 9.0   | 2.1        |
| 4                                | 99.8                     | 10.4            | 56.1   | 27.3 | 6.2   | 2.1        |

Reaction conditions: Catalyst, Cu-Cr-Co/Al<sub>2</sub>O<sub>3</sub>; DMA/DEG (molar ratio) = 4:1; Temperature, 190 °C; LHSV, 0.3 h<sup>-1</sup>; Solvent, Methanol.

Table S6 Reaction of DEG with DMA over different substrate molar ratio.

| DMA/DEG<br>(molar ratio) | DEG<br>Conversion<br>(%) | Selectivity (%) |        |      |       | BDMAEE/NMM |
|--------------------------|--------------------------|-----------------|--------|------|-------|------------|
|                          |                          | DMAEE           | BDMAEE | NMM  | Other |            |
| 2:1                      | 87.8                     | 21.3            | 16.8   | 57.2 | 4.7   | 0.3        |
| 3:1                      | 99.1                     | 16.9            | 44.6   | 29.9 | 8.6   | 1.5        |
| 4:1                      | 99.6                     | 9.1             | 55.2   | 26.7 | 9.0   | 2.1        |
| 5:1                      | 99.5                     | 8.9             | 55.0   | 27.8 | 8.3   | 2.0        |

Reaction conditions: Catalyst, Cu-Cr-Co/Al<sub>2</sub>O<sub>3</sub>; Temperature, 190 °C; H<sub>2</sub> pressure, 3 MPa; LHSV, 0.3 h<sup>-1</sup>; Solvent, Methanol.

Table S7 Comparison studies on catalytic performance toward DEG amination with DMA over reported catalysts

| Entry | Catalyst                                                                                             | DMA/DEG<br>(molar) | Temperature<br>(°C) | Time<br>(h) | BDMAEE yield<br>(%) | Reference |
|-------|------------------------------------------------------------------------------------------------------|--------------------|---------------------|-------------|---------------------|-----------|
| 1     | Cu-Cr-Co/Al <sub>2</sub> O <sub>3</sub> (Cu 20wt.%)                                                  | 4                  | 190                 | Continuous  | 55                  | This work |
| 2     | Cu/Al <sub>2</sub> O <sub>3</sub> (Cu 55wt.%)                                                        | -                  | 210                 | Continuous  | ~40                 | 1         |
| 3     | IrH <sub>2</sub> Cl[( <sup>i</sup> Pr <sub>2</sub> PC <sub>2</sub> H <sub>4</sub> ) <sub>2</sub> NH] | 3                  | 140                 | 20          | ~15                 | 2         |
| 4     | NHC-Ir                                                                                               | 6                  | 120                 | 40          | 55                  | 3         |



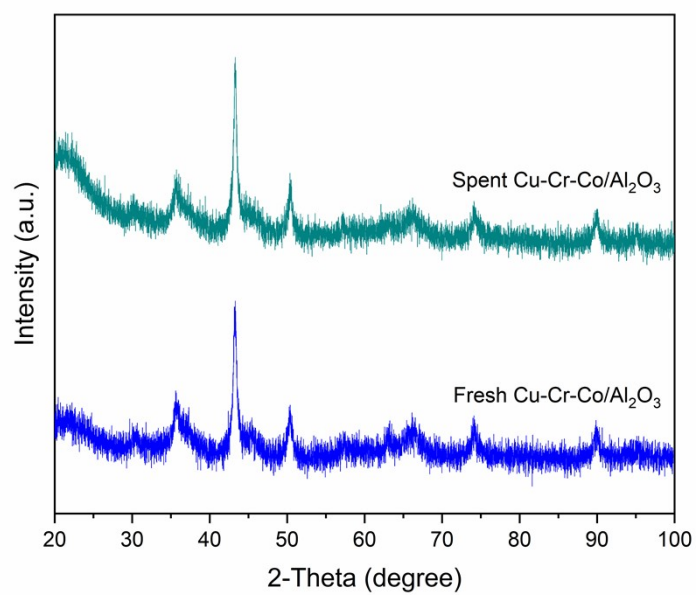

Figure S9 XRD patterns of fresh and spent Cu-Cr-Co/Al<sub>2</sub>O<sub>3</sub> catalysts.

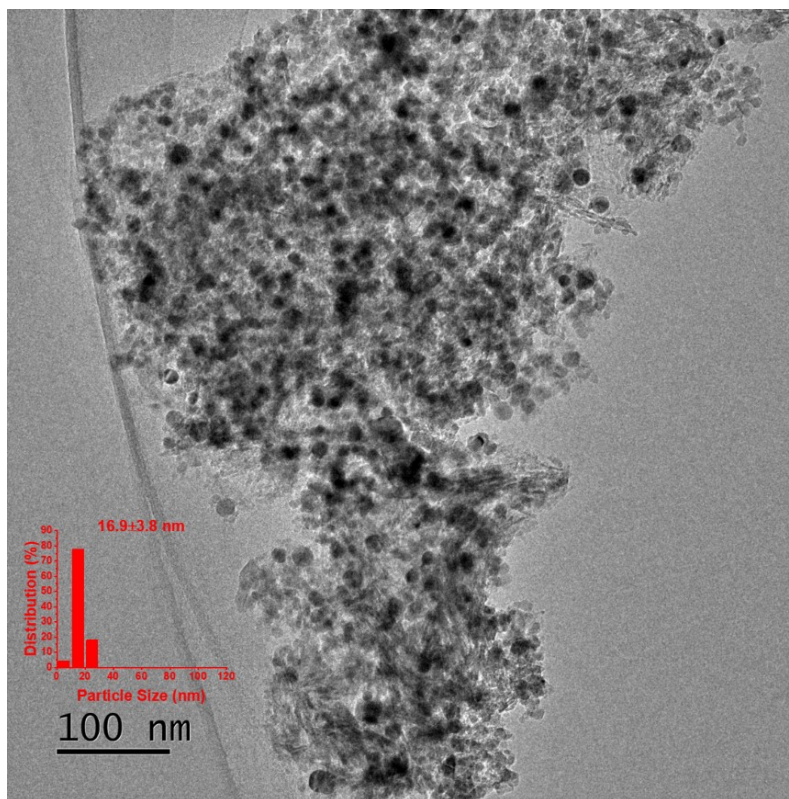

Figure S10 TEM image of spent Cu-Cr-Co/Al<sub>2</sub>O<sub>3</sub>.

Table S8 Metal loading of the fresh and spent Cu-Cr-Co/Al<sub>2</sub>O<sub>3</sub> catalysts determined by ICP-OES

| Catalyst                                      | Metal loading (%) |      |      |
|-----------------------------------------------|-------------------|------|------|
|                                               | Cu                | Cr   | Co   |
| Fresh Cu-Cr-Co/Al <sub>2</sub> O <sub>3</sub> | 17.87             | 6.54 | 4.06 |
| Spent Cu-Cr-Co/Al <sub>2</sub> O <sub>3</sub> | 17.63             | 6.41 | 3.97 |

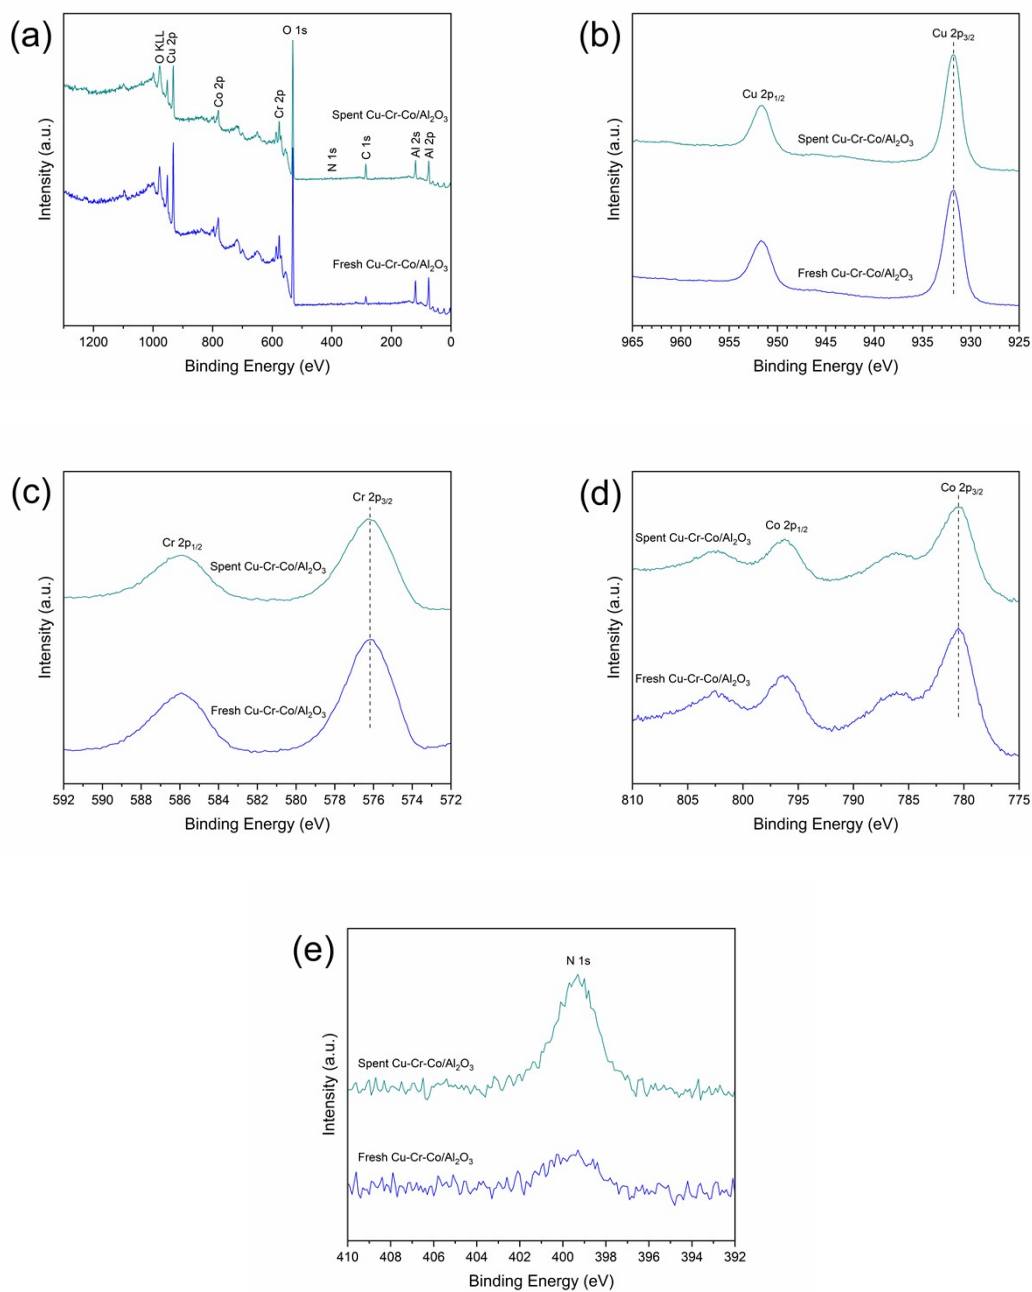

Figure S11 (a) XPS survey, (b) Cu 2p, (c) Cr 2p, (d) Co 2p and (e) N 1s spectra of fresh and spent Cu-Cr-Co/Al<sub>2</sub>O<sub>3</sub> catalysts.

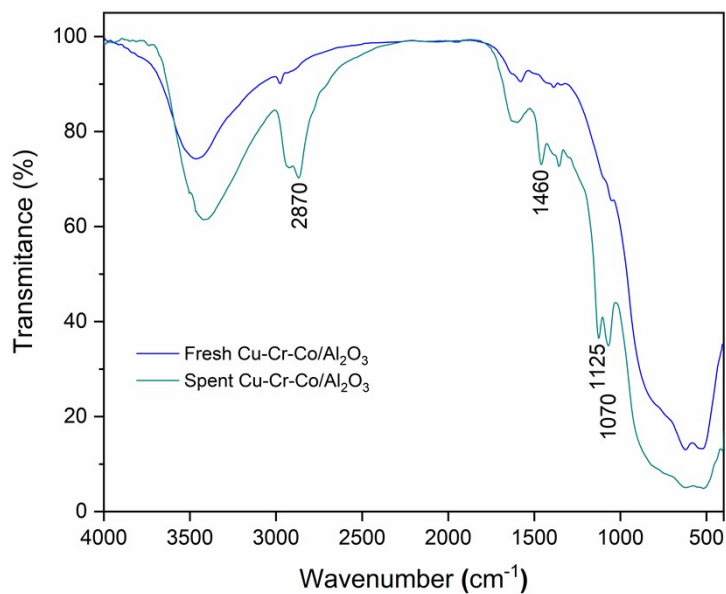

Figure S12 FT-IR spectra of fresh and spent Cu-Cr-Co catalysts.  $\sim 2870 \text{ cm}^{-1}$  for  $\nu_{\text{C-H}}$ ,  $1460 \text{ cm}^{-1}$  for  $\delta_{\text{C-H}}$ ,  $\sim 1125\text{-}1070 \text{ cm}^{-1}$  for  $\nu_{\text{C-N}}$ .

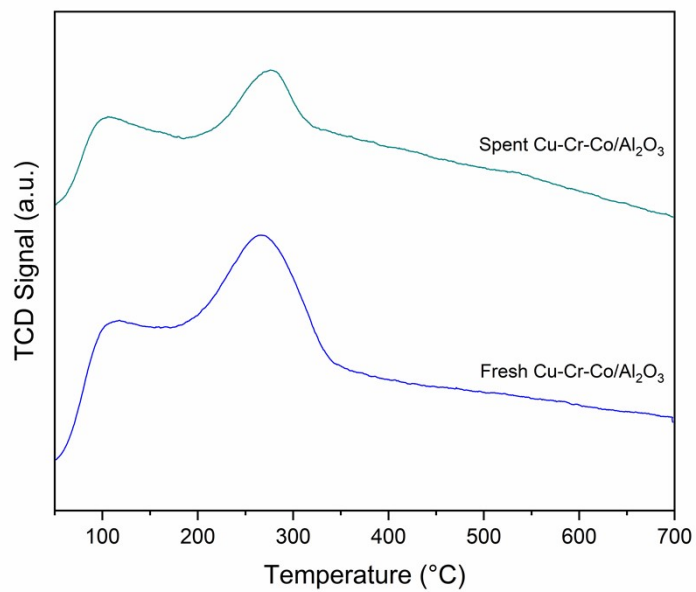

Figure S13  $\text{NH}_3$ -TPD profiles of fresh and spent Cu-Cr-Co/ $\text{Al}_2\text{O}_3$  catalysts.

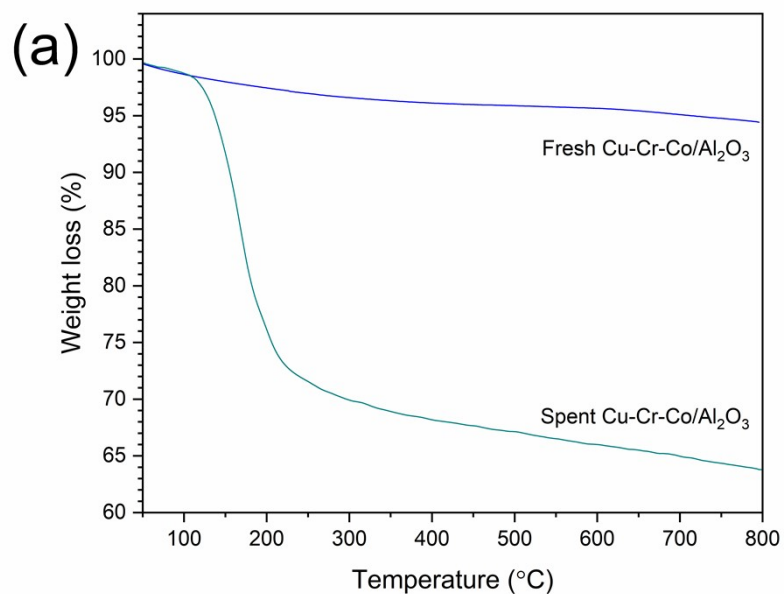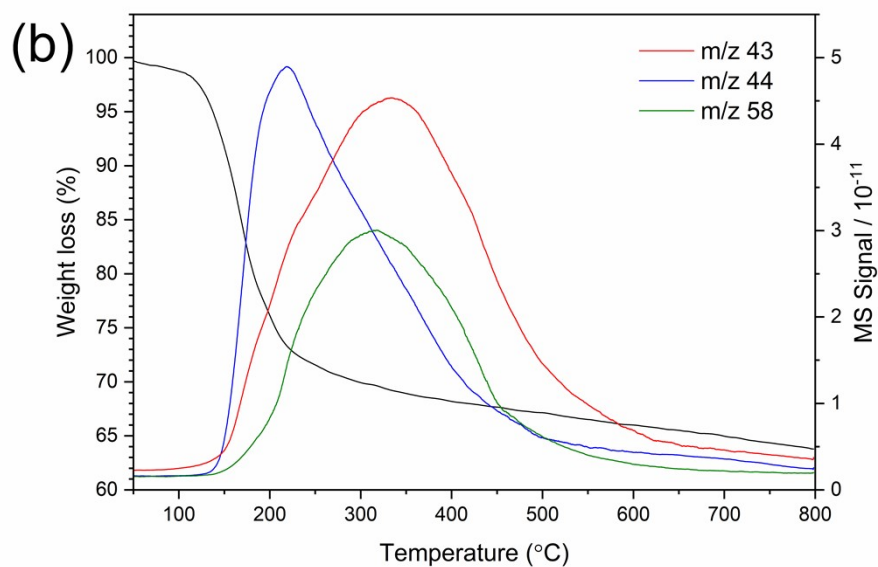

Figure S14 (a) TG spectra of fresh and spent Cu-Cr-Co/Al<sub>2</sub>O<sub>3</sub> catalysts and (b) selected MS ion intensity curves and TG spectrum spent Cu-Cr-Co/Al<sub>2</sub>O<sub>3</sub> catalysts.

1. WO2010031719, 2015.
2. N. Andrushko, V. Andrushko, P. Roose, K. Moonen and A. Börner, *ChemCatChem*, 2010, **2**, 640-643.
3. J. Jeong and K.-i. Fujita, *ChemCatChem*, 2021, DOI: 10.1002/cctc.202101499.
